# Supplementary material for: Anti-Obesity Effect of a Tea Mixture Nano-Formulation on Rats Occurs via the Upregulation of AMP-Activated Protein Kinase/Sirtuin-1/Glucose Transporter Type 4 and Peroxisome Proliferator-Activated Receptor Gamma Pathways
Source: MDPI journal article supplement (doi:10.3390/metabo13070871), 2023-07-21
Supplement: s1 [file s1]

Supplementary Materials

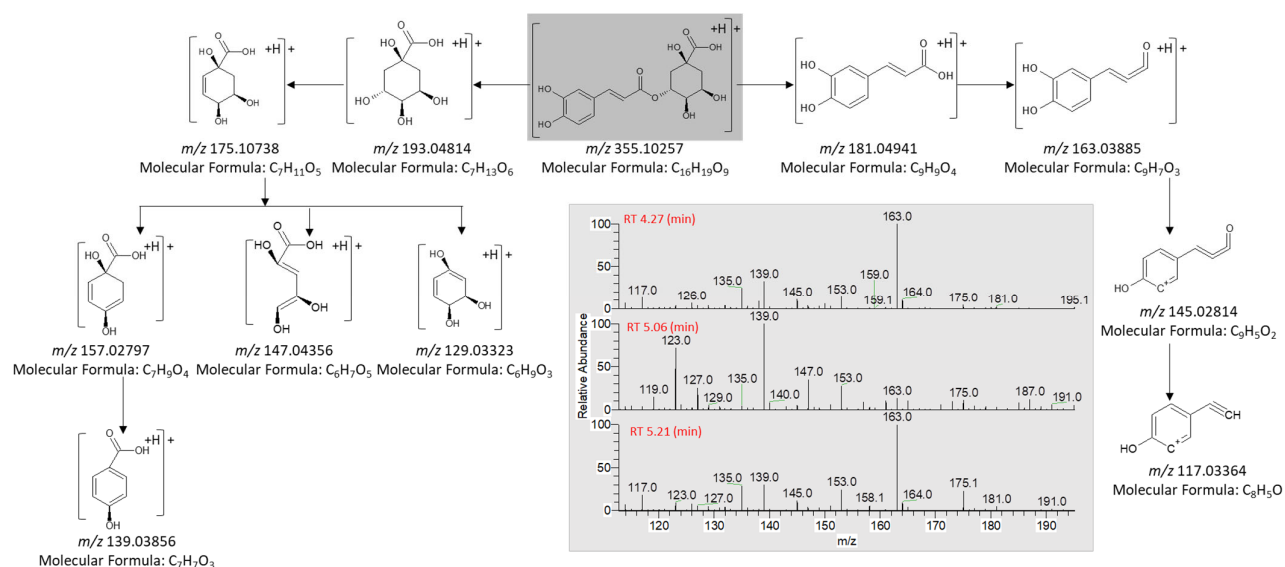

**Figure S1.** Positive electrospray ionization tandem mass spectrometry (ESI-MS/MS) analysis of caffeoylquinic acid.

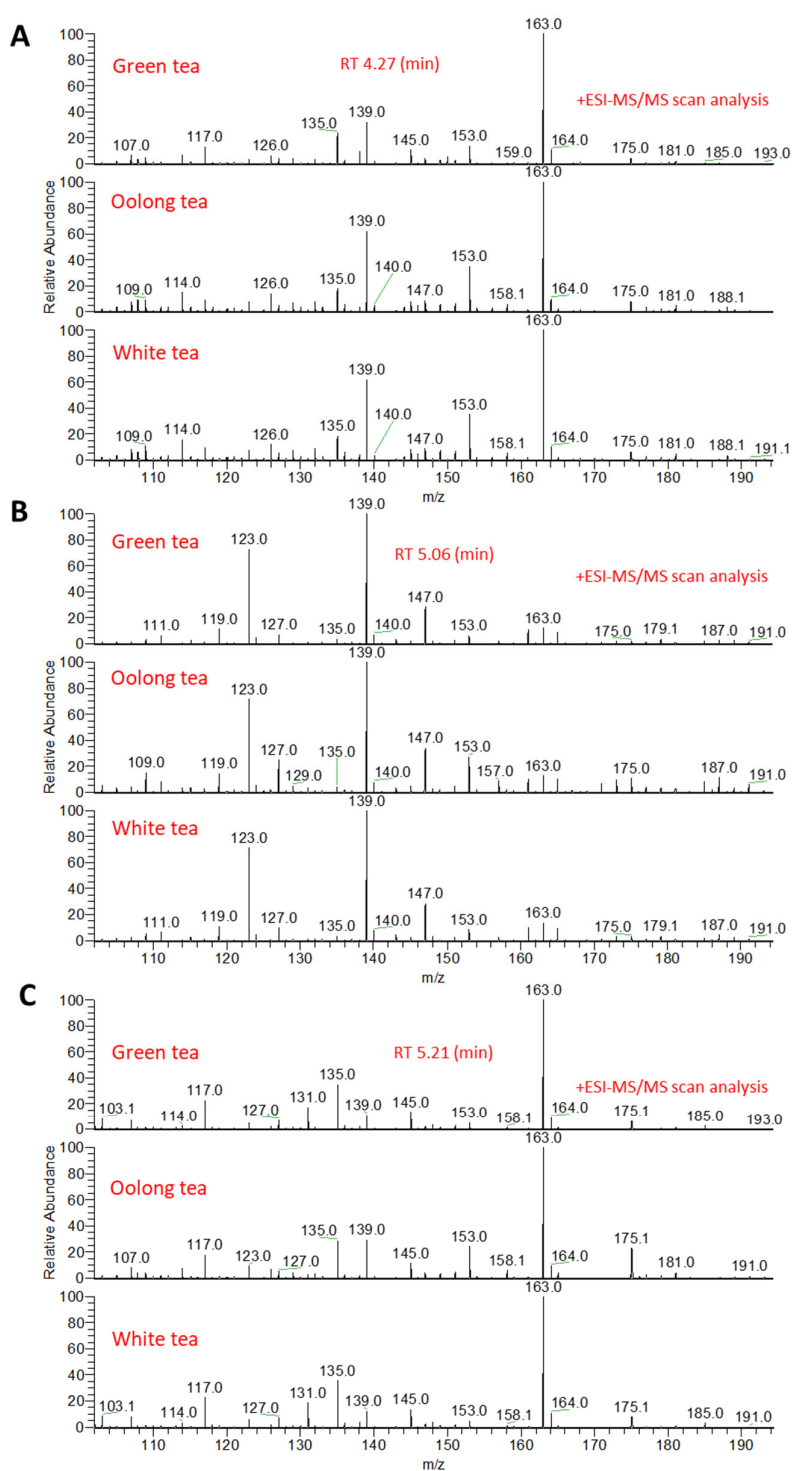

**Figure S2.** Positive electrospray ionization tandem mass spectrometry (ESI-MS/MS) analysis of caffeoylquinic acid isomers; 5-CQA (A), 3-CQA (B) and 4-CQA (C).

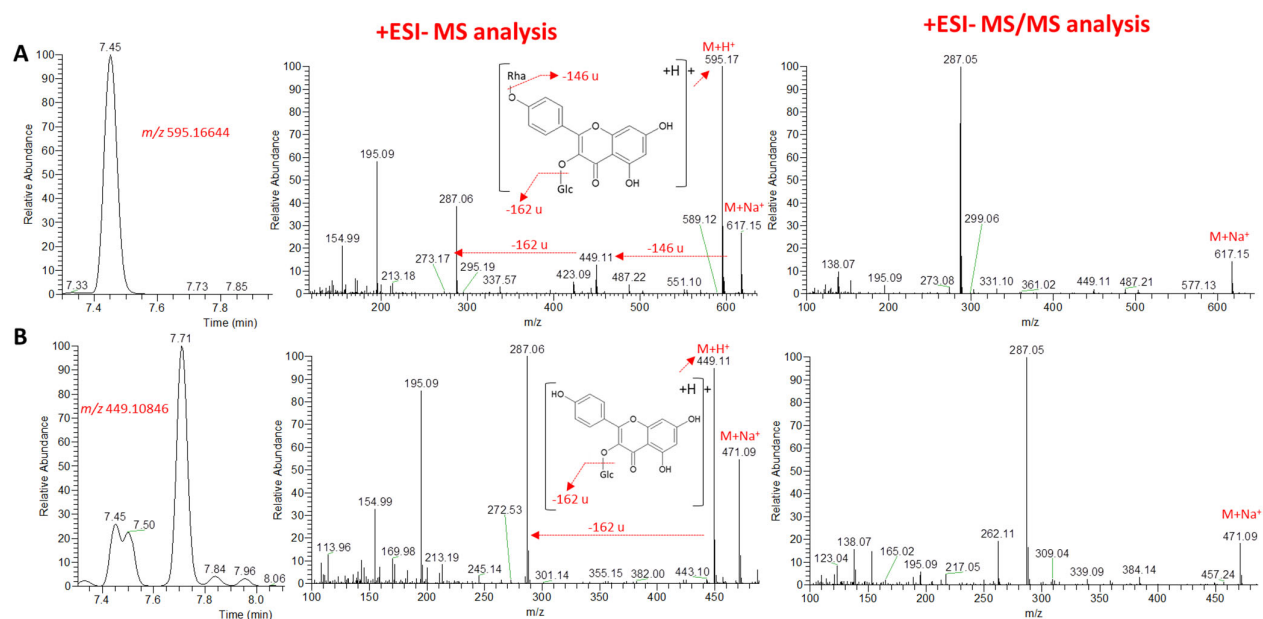

**Figure S3.** UPLC-MS analysis of kaempferol glycosides from tea. Extracted ion chromatogram (XIC) for the peaks representing kaempferol glucoside rhamnoside (A) and kaempferol glucoside (B) using positive electrospray ionization-mass spectrometry (+ESI-MS).

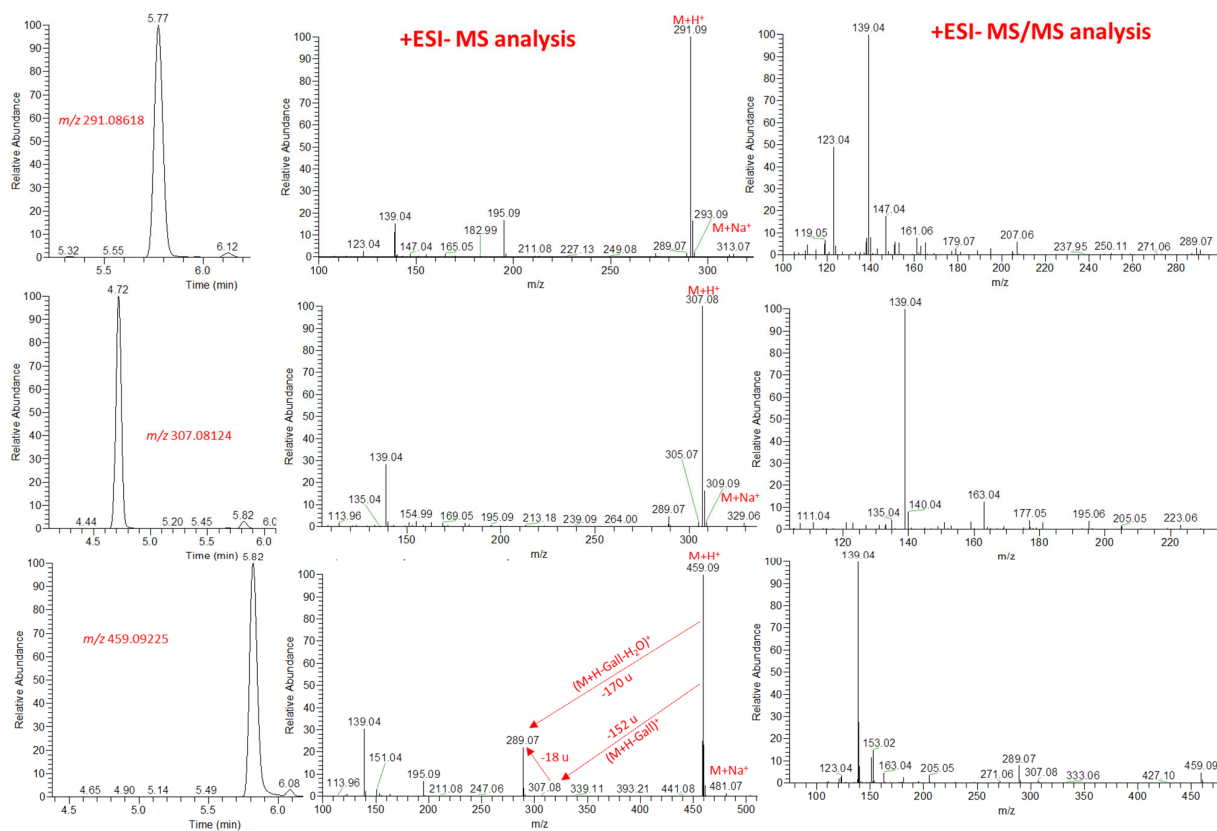

**Figure S4.** UPLC-MS analysis of catechins from tea. Extracted ion chromatogram (XIC) for the peaks representing catechin (A), gallic catechin (B) and gallic catechin gallate (C) using positive electrospray ionization-mass spectrometry (+ESI-MS).

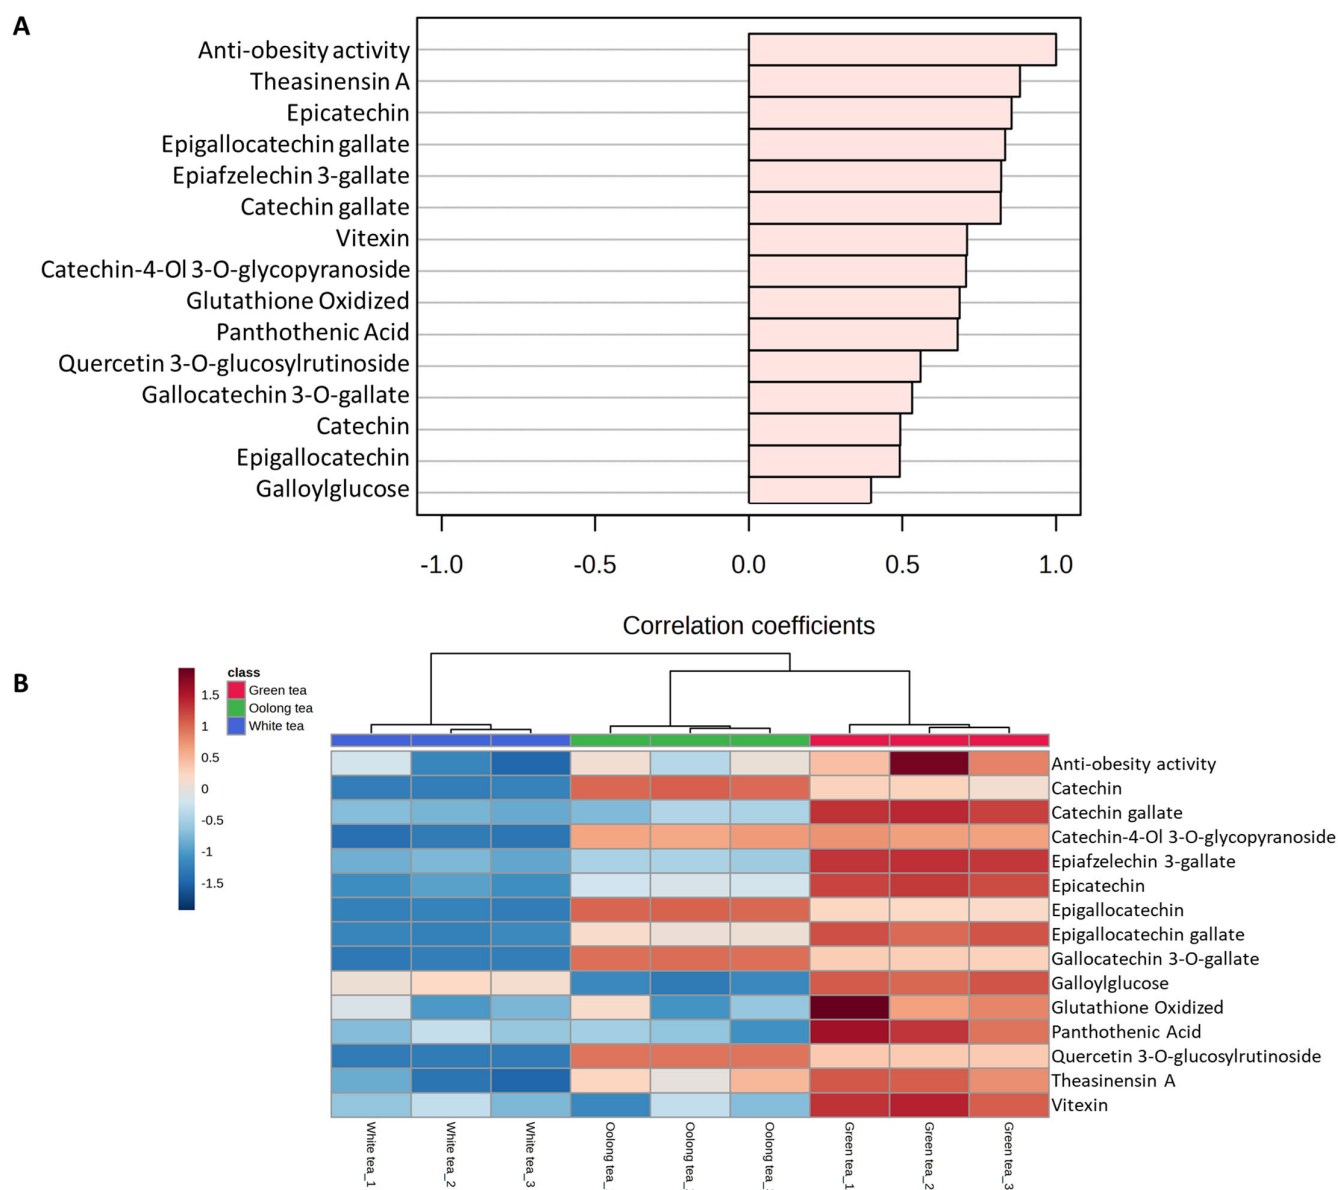

**Figure S5.** Top metabolites correlated with anti-obesity activity represented by pancreatic lipase inhibition activity. **A.** Pearson's correlation coefficients indicate the relationship between metabolites and pancreatic lipase inhibition activity. **B.** Heat map for the distribution of metabolites correlated with the pancreatic lipase inhibition. The average metabolite abundance from three biological replicates was used for the generation of heat maps.

**Table S1.** Metabolites annotated from tea extracts after UPLC-MS/MS analysis.

| Compound Name                               | Formula           | Detected<br>m/z | Delta<br>(ppm) | RT<br>(min) | Green<br>tea_1 | Green<br>tea_2 | Green<br>tea_3 | Oolong<br>tea_1 | Oolong<br>tea_2 | Oolong<br>tea_3 | White<br>tea_1 | White<br>tea_2 | White<br>tea_3 |
|---------------------------------------------|-------------------|-----------------|----------------|-------------|----------------|----------------|----------------|-----------------|-----------------|-----------------|----------------|----------------|----------------|
| 4-Caffeoylquinic acid #                     | C16H18O9          | 355.1026        | 0.59           | 5.2         | 19281984       | 19261982       | 17828852       | 428209          | 423013          | 429595          | 6195707        | 6071654        | 6200066        |
| 5-Caffeoylquinic acid #                     | C16H18O9          | 355.1025        | 0.42           | 4.26        | 5986542        | 5597613        | 5429651        | 197615          | 234222          | 209085          | 1902277        | 2078854        | 1923423        |
| 6-Hydroxynicotinic Acid                     | C6H5NO3           | 140.0343        | 0.7            | 2.43        | 52765          | 30512          | 22351          | 53567           | 25273           | 34818           | 81628          | 45310          | 38939          |
| Apigenin 6-C-glucoside 8-C-arabino-<br>side | C26H28O14         | 565.1556        | 0.81           | 6.29        | 10710718       | 10500091       | 10278104       | 1.29E+08        | 1.29E+08        | 1.22E+08        | 30977576       | 31977698       | 30753866       |
| Caffeine #                                  | C8H10N4O2         | 195.0876        | −0.11          | 5.26        | 8.21E+09       | 7.89E+09       | 8E+09          | 3.86E+09        | 4.02E+09        | 4.03E+09        | 7.76E+09       | 7.69E+09       | 7.34E+09       |
| Catechin #                                  | C15H14O6          | 291.0862        | −0.35          | 5.77        | 4.33E+08       | 4.29E+08       | 3.92E+08       | 6.73E+08        | 6.97E+08        | 6.7E+08         | 1.71E+08       | 1.7E+08        | 1.74E+08       |
| Catechin gallate                            | C22H18O10         | 443.0974        | 0.24           | 6.99        | 8.15E+08       | 8.34E+08       | 7.89E+08       | 3.87E+08        | 4.3E+08         | 4.25E+08        | 3.9E+08        | 3.81E+08       | 3.68E+08       |
| Catechin-4-Ol 3-O-glycopyranoside           | C21H24O12         | 469.1318        | −4.79          | 6.07        | 26014060       | 23605056       | 22989732       | 22547804        | 21764732        | 24679842        | 1523951        | 1749850        | 1638752        |
| Cinnamic acid #                             | C9H8O2            | 149.0598        | 0.52           | 3.27        | 4439384        | 5162491        | 4628289        | 250044          | 284695          | 284743          | 4217960        | 4894406        | 4163018        |
| Coumaroylquinic acid #                      | C16H18O8          | 339.1076        | 0.47           | 5.89        | 25017584       | 23549514       | 24765144       | 2435689         | 2560064         | 2466344         | 10970228       | 12006367       | 11399339       |
| Epiafzelechin 3-gallate                     | C22H18O9          | 427.1029        | 1.35           | 7.84        | 34319554       | 35188845       | 34078953       | 7603263         | 7623562         | 7144264         | 5745980        | 6120647        | 5375483        |
| Epicatechin #                               | C15H14O6          | 291.0862        | −0.46          | 5.05        | 1.8E+08        | 1.86E+08       | 1.75E+08       | 79334750        | 82252603        | 80525202        | 47352807       | 52534241       | 47564892       |
| Epicatechin 3-glucoside                     | C21H24O11         | 453.139         | −0.22          | 6.52        | 193357         | 197226         | 192699         | 424804          | 435406          | 384198          | 110764         | 103835         | 100021         |
| Epicatechin 3-O-(3-O-methylgallate)         | C23H20O10         | 457.1132        | 0.52           | 7.81        | 539520         | 448937         | 497366         | 21644919        | 22164645        | 21691882        | 141488         | 157641         | 130374         |
| Epigallocatechin #                          | C15H14O7          | 307.0812        | 0.03           | 3.8         | 44840297       | 43699803       | 42427499       | 1.2E+08         | 1.21E+08        | 1.18E+08        | 7145960        | 7338307        | 6922412        |
| Epigallocatechin 3-(4-methyl-gallate)       | C23H20O11         | 473.1079        | 0.09           | 6.66        | 1123138        | 1004143        | 1024972        | 71164248        | 69333920        | 71702424        | 213231         | 245699         | 182902         |
| Epigallocatechin gallate #                  | C22H18O11         | 459.0923        | 0.15           | 5.81        | 1.07E+09       | 1.01E+09       | 1.06E+09       | 7.22E+08        | 6.91E+08        | 6.92E+08        | 4.2E+08        | 4.11E+08       | 4.27E+08       |
| Gallocatechin                               | C15H14O7          | 307.0813        | 0.13           | 4.72        | 2.55E+08       | 2.26E+08       | 2.38E+08       | 7.71E+08        | 8.22E+08        | 7.73E+08        | 59715823       | 64571245       | 62783061       |
| Gallocatechin 3-O-gallate                   | C22H18O11         | 459.0927        | 1.01           | 6.08        | 33175142       | 32758430       | 31496218       | 81761358        | 82549597        | 81326080        | 3463175        | 3801373        | 3772607        |
| Galloylglucose                              | C13H16O10         | 333.0816        | 0.03           | 2.54        | 1015576        | 932951         | 1055180        | 93136           | 80624           | 92689           | 341232         | 402125         | 364913         |
| Glutathione Oxidized #                      | C20H32N6O12S<br>2 | 613.1594        | 0.2            | 2.2         | 2017927        | 734863         | 850712         | 495005          | 188328          | 268808          | 391361         | 192997         | 236592         |
| Isoleucine #                                | C6H13NO2          | 132.1021        | 1.79           | 1.92        | 50843862       | 52584016       | 38217915       | 2110764         | 2243738         | 2221396         | 41220787       | 49115540       | 46576073       |
| Kaempferol 3-glucoside-7-rhamno-<br>side    | C27H30O15         | 595.1664        | 1.17           | 7.44        | 37854134       | 38630012       | 38273618       | 1.32E+08        | 1.35E+08        | 1.37E+08        | 1.27E+08       | 1.26E+08       | 1.3E+08        |
| Kaempferol 3-O-glucoside                    | C21H20O11         | 449.1085        | 1.38           | 7.71        | 19368045       | 19701707       | 20257092       | 51739360        | 54233437        | 51447262        | 42412228       | 44173552       | 40936414       |
| Leucine #                                   | C6H13NO2          | 132.1021        | 1.56           | 2.08        | 69239691       | 73305707       | 58877382       | 2917896         | 3146124         | 3079156         | 44931802       | 54624694       | 49369227       |
| Methyl jasmonate                            | C13H20O3          | 225.1486        | 0.17           | 5.87        | 130079         | 95812          | 104767         | 1121993         | 1089949         | 1128180         | 296127         | 325498         | 317624         |
| Methylxanthine #                            | C6H7N4O2          | 168.0632        | −5.89          | 2.83        | 596926         | 624114         | 621791         | 152810          | 183441          | 160836          | 1437620        | 3885539        | 2555870        |
| Myricetin 3-galactoside                     | C21H20O13         | 481.0982        | 1.06           | 6.42        | 24947453       | 24523520       | 24875727       | 76706804        | 81452921        | 77336779        | 37695213       | 39660552       | 38012826       |

|                                  |            |          |       |      |          |          |          |          |          |          |          |          |          |
|----------------------------------|------------|----------|-------|------|----------|----------|----------|----------|----------|----------|----------|----------|----------|
| N-Acetyl-Tryptophane             | C13H14N2O3 | 247.1076 | −0.34 | 7.13 | 103415   | 80743    | 86553    | 38158    | 22290    | 21913    | 94950    | 114747   | 114006   |
| Panthothenic Acid                | C9H17NO5   | 220.118  | 0.42  | 3.72 | 4294532  | 4023815  | 3680716  | 2600323  | 2527937  | 2270739  | 2475101  | 2741010  | 2538153  |
| Phenylalanine #                  | C9H11NO2   | 166.0864 | 0.66  | 3.27 | 4.73E+08 | 5.24E+08 | 4.8E+08  | 22843567 | 25824174 | 23928961 | 4.36E+08 | 4.95E+08 | 4.61E+08 |
| Proline #                        | C5H9NO2    | 116.0709 | 2.28  | 0.67 | 132066   | 66959    | 139851   | 112046   | 176102   | 144712   | 75100    | 181028   | 151123   |
| Quercetin 3,7-dirhamnoside       | C27H30O15  | 595.1658 | 0.14  | 6.61 | 1489257  | 1382867  | 1460600  | 61588931 | 61232372 | 63535543 | 1057996  | 975859   | 919589   |
| Quercetin 3-glucoside #          | C21H20O12  | 465.1034 | 1.44  | 7.12 | 39494536 | 40134942 | 39893065 | 1.2E+08  | 1.23E+08 | 1.23E+08 | 1.27E+08 | 1.36E+08 | 1.23E+08 |
| Quercetin 3-O-glucosylrutinoside | C33H40O21  | 773.214  | 0.65  | 6.62 | 17691032 | 17017512 | 17023256 | 1.49E+08 | 1.47E+08 | 1.48E+08 | 52290    | 51244    | 50124    |
| Quercetin- O-rutinoside #        | C27H30O16  | 611.1613 | 0.97  | 6.88 | 61917744 | 59817456 | 61602164 | 2.16E+08 | 2.14E+08 | 2.24E+08 | 2.16E+08 | 2.17E+08 | 2.18E+08 |
| Theaflavin                       | C29H24O12  | 565.1346 | 0.94  | 9.11 | 2975347  | 2937889  | 2866946  | 712805   | 746377   | 753780   | 6083317  | 5867731  | 5800131  |
| Theaflavin 3,3'-digallate        | C43H32O20  | 869.1559 | −0.03 | 9.56 | 2086328  | 2495365  | 2679620  | 42865    | 61281    | 52043    | 6248837  | 7407354  | 7197808  |
| Theaflavin-3-gallate             | C36H28O16  | 717.1453 | 0.35  | 9.4  | 1635946  | 1655994  | 1596104  | 137526   | 139757   | 167094   | 4797835  | 4611507  | 4701137  |
| Theasinensin A                   | C44H34O22  | 915.16   | −1.61 | 5.82 | 4308696  | 4267318  | 3795647  | 3117946  | 2818284  | 3410687  | 2047404  | 1698038  | 1614575  |
| Theasinensin B                   | C37H30O18  | 763.15   | −0.61 | 4.26 | 2082973  | 1819919  | 1812112  | 558565   | 534997   | 536188   | 4928008  | 4121515  | 4248376  |
| Theasinensin C                   | C30H26O14  | 611.1396 | 0.09  | 2.51 | 129744   | 131585   | 140045   | 119645   | 113308   | 135697   | 178608   | 185451   | 197886   |
| Theobromine #                    | C7H8N4O2   | 181.072  | −0.31 | 3.82 | 7.17E+08 | 7.06E+08 | 7.41E+08 | 51654093 | 54992955 | 52755691 | 6.22E+08 | 6.63E+08 | 6.27E+08 |
| Theogallin #                     | C14H16O10  | 345.0817 | 0.21  | 3.02 | 5.82E+08 | 4.65E+08 | 5.31E+08 | 33644791 | 28829873 | 31062117 | 3.57E+08 | 2.85E+08 | 2.95E+08 |
| Tryptophan #                     | C11H12N2O2 | 205.0973 | 0.51  | 4.31 | 1.29E+08 | 1.22E+08 | 1.22E+08 | 17508966 | 18300352 | 18349954 | 62910114 | 73826182 | 68671607 |
| Tyramine #                       | C8H11NO    | 138.0916 | 1.54  | 2.03 | 20596    | 9868     | 102274   | 25955    | 16303    | 32671    | 22156    | 33065    | 32577    |
| Tyrosine #                       | C9H11NO3   | 182.0815 | 1.55  | 1.92 | 25842043 | 26687149 | 19337812 | 1746195  | 1443308  | 1366197  | 22169346 | 25531568 | 23689902 |
| Uric Acid #                      | C5H4N4O3   | 169.0347 | −5.16 | 1.3  | 21585    | 26650    | 34235    | 32786    |          | 29951    | 27039    | 32458    | 31098    |
| Vitexin #                        | C21H20O10  | 433.1133 | 0.9   | 6.99 | 5.91E+08 | 6.02E+08 | 5.66E+08 | 3.88E+08 | 4.48E+08 | 4.2E+08  | 4.25E+08 | 4.48E+08 | 4.16E+08 |

# This metabolite was detected in the human blood using the public Human Metabolome Database (HMDB) [57].

---

**References:**

57. Wishart, D.S.; Guo, A.; Oler, E.; Wang, F.; Anjum, A.; Peters, H.; Dizon, R.; Sayeeda, Z.; Tian, S.; Lee, B.L.; Berjanskii, M.; *et al.* HMDB 5.0: The Human Metabolome Database for 2022. *Nucleic Acids Res.* **2022**, *50*, 622–631.
